# Supplementary material
Source: PubMed Central journal article supplement (PMC7394306)
Supplement: NIHMS1609104-supplement-Supplementary_Info.pdf [file NIHMS1609104-supplement-Supplementary_Info.pdf]

## **Astrogliosis in a Dish: Substrate Stiffness Induces Astrogliosis in Primary Rat Astrocytes**

Christina L. Wilson<sup>1</sup>, Stephen L. Hayward<sup>1</sup>, and Srivatsan Kidambi<sup>1,2,3,4,5,\*</sup>

<sup>1</sup>Department of Chemical and Biomolecular Engineering,

820 N 16<sup>th</sup> Street, 207 Othmer Hall, University of Nebraska-Lincoln, NE, 68588

<sup>2</sup>Nebraska Center for Materials and Nanoscience,

855 N 16<sup>th</sup> St, Lincoln, University of Nebraska-Lincoln, NE, 68588

<sup>3</sup>Nebraska Center for the Prevention of Obesity Diseases,

316C Leverton Hall, 1700 35<sup>th</sup> Street, University of Nebraska-Lincoln, NE, 68583

<sup>4</sup>Mary and Dick Holland Regenerative Medicine Program,

42nd and Emile Street, University of Nebraska Medical Center, Omaha, NE, 68198.

<sup>5</sup>Fred & Pamela Buffett Cancer Center,

University of Nebraska Medical Center, Omaha NE, 68198.

\*indicates corresponding author.

Srivatsan Kidambi

Department of Chemical and Biomolecular Engineering

University of Nebraska-Lincoln

820 N 16 Street, 207 Othmer Hall, Lincoln NE 68588

Ph: 402-472-4443

Email: [skidambi2@unl.edu](mailto:skidambi2@unl.edu)

Keywords: In Vitro Brain Model, Astrogliosis, Stiffness, Astrocytes

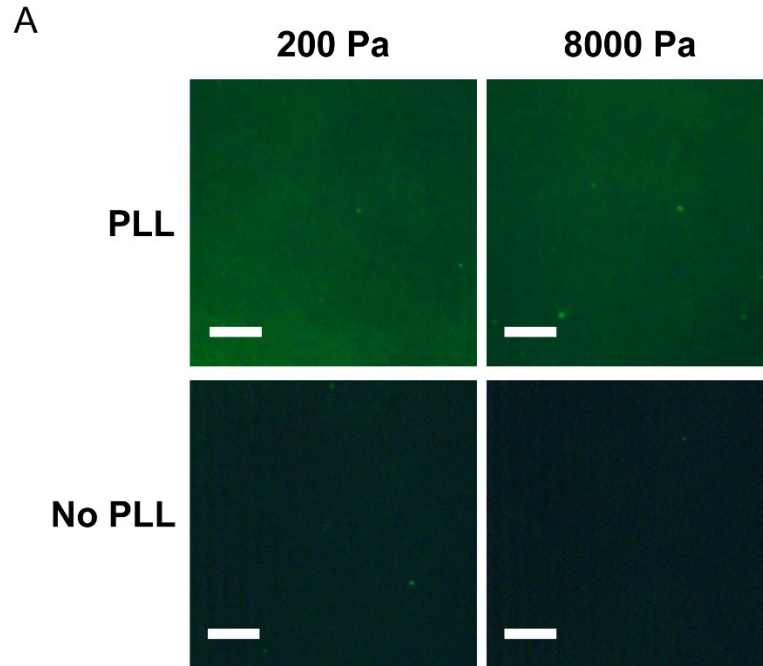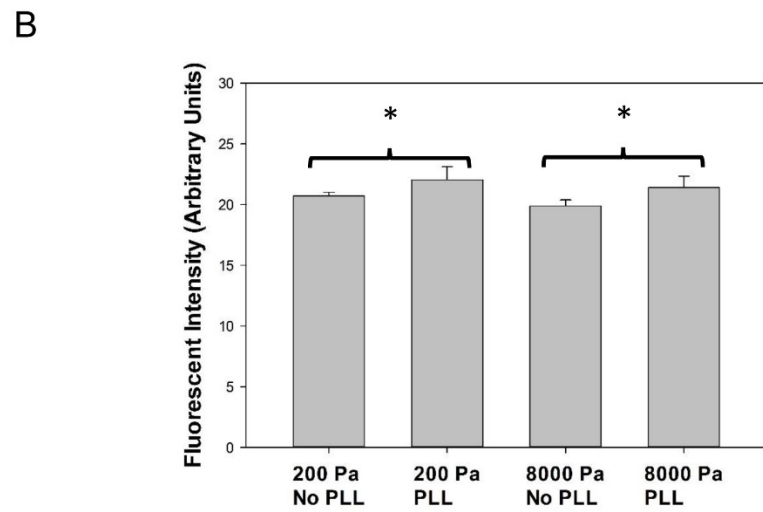

**Supplemental Figure 1:** PLL coating characterization on 200 Pa and 8000 Pa surfaces through images (A) and quantification of fluorescence using image J (B) reveals similar uniform coating on soft and stiff surfaces. Scale Bar 100  $\mu\text{m}$ . “\*” P < 0.05

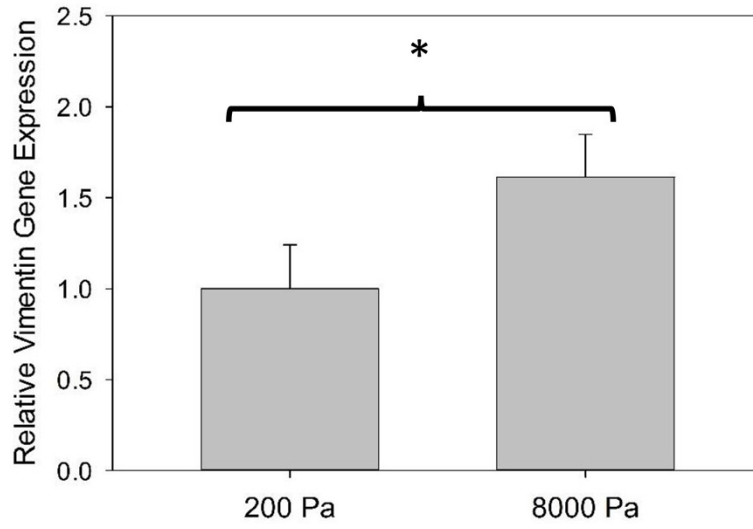

**Supplemental Figure 2:** RT-PCR gene expression quantification of Vimentin on soft and stiff surfaces, N = 3. “\*” P < 0.05

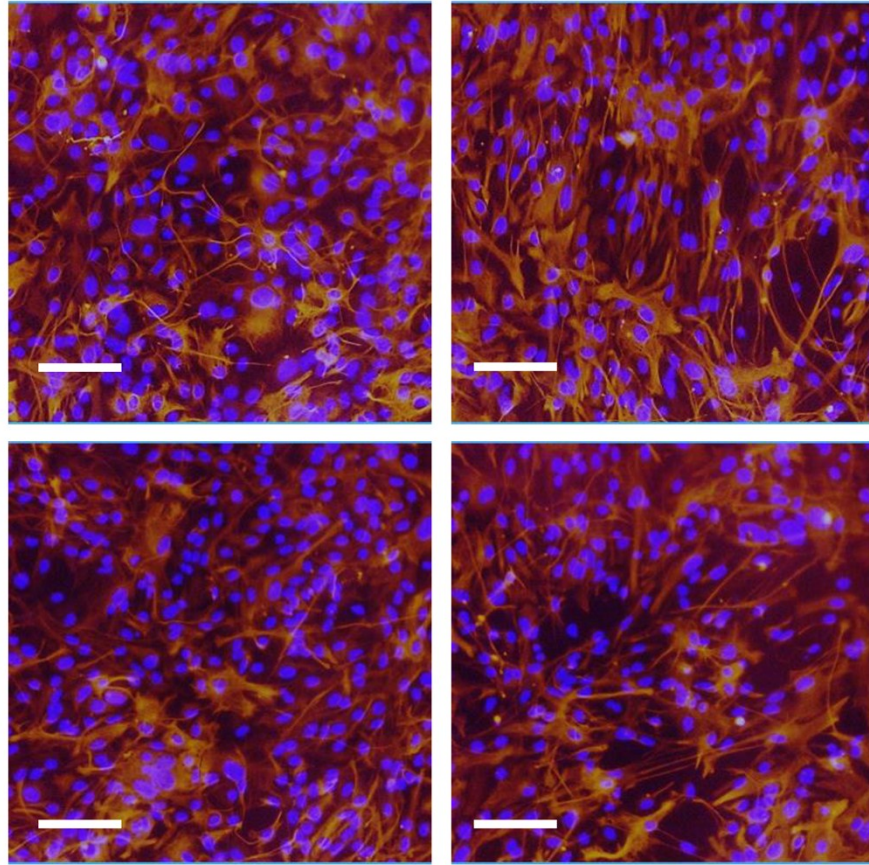

**Supplemental Figure 3.** Representative images of the astrocyte culture. The astrocyte culture utilized for experiments was characterized by immunostaining with anti-glial fibrillary acidic protein (GFAP, red) and DAPI nuclear staining (blue). Cells were fixed with 4% paraformaldehyde for 20 min, permeabilized in 0.1% Triton X-100 for 15 min and background blocked with 1% bovine serum albumin (BSA) in PBS for 1 hr at room temperature. Cells were stained in primary antibody solution (1:1000 anti-GFAP [DAKO] in 1% BSA in PBS) at 4 °C overnight, secondary antibody solution (1:500 anti-Rabbit rhodamine [Millipore] in PBS) for 2 hr at room temperature and DAPI staining solution (1 µg/ml DAPI in PBS) for 5 min at room temperature. Images were obtained using Axiovert 40 CFL [Zeiss] and images taken with a Progres C3 [Jenoptick] camera with an X-Cite series 120Q [Lumen Dynamics] lamp and a CY3 or DAPI filter [Chroma]. Culture purity was determined to be > 90 % astrocytes by counting the number of GFAP positive nuclei over the total nuclei using Image J cell counter, N = 8 images, Scale bar 100 µm.
